# Supplementary material for: Four metal–organic frameworks based on the 5-(1H-tetrazol-5-yl)isophthalic acid ligand: luminescence and magnetic properties
Source: Royal Society of Chemistry journal article supplement (doi:10.1039/c5ce02096d), 2016-01-01
Supplement: c5ce02096d1.pdf [file c5ce02096d1.pdf]

## Four metal-organic frameworks based on the 5-(1H-tetrazol-5-yl)isophthalic acid ligand: Luminescence and magnetic properties

Wei Gao, Peng Li, Feng Liu, Xiu-Mei Zhang,\* and Jie-Ping Liu

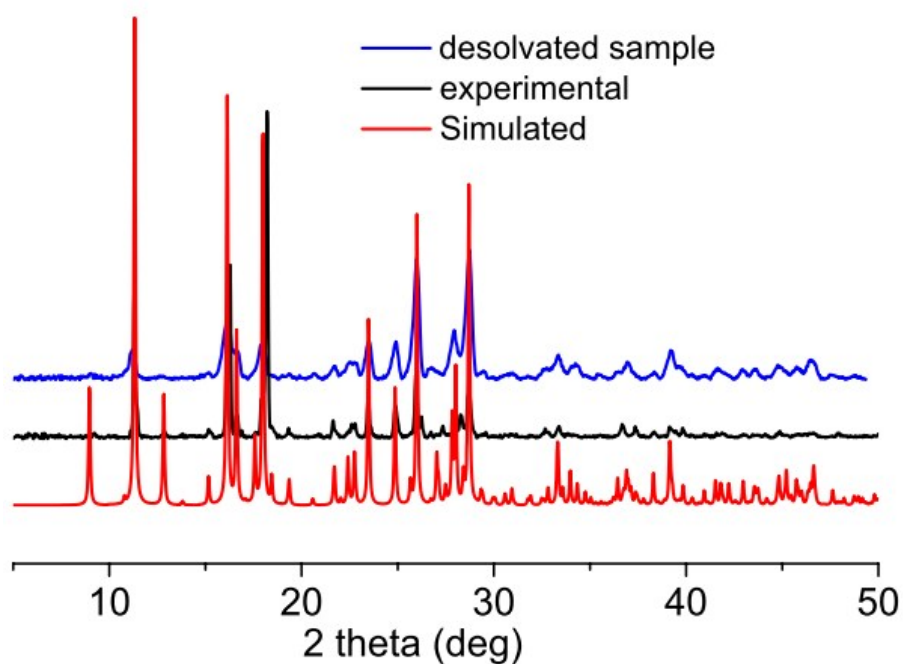

Fig. S1. PXRD patterns for **1** (simulated: red; experimental: black; desolvated sample: blue).

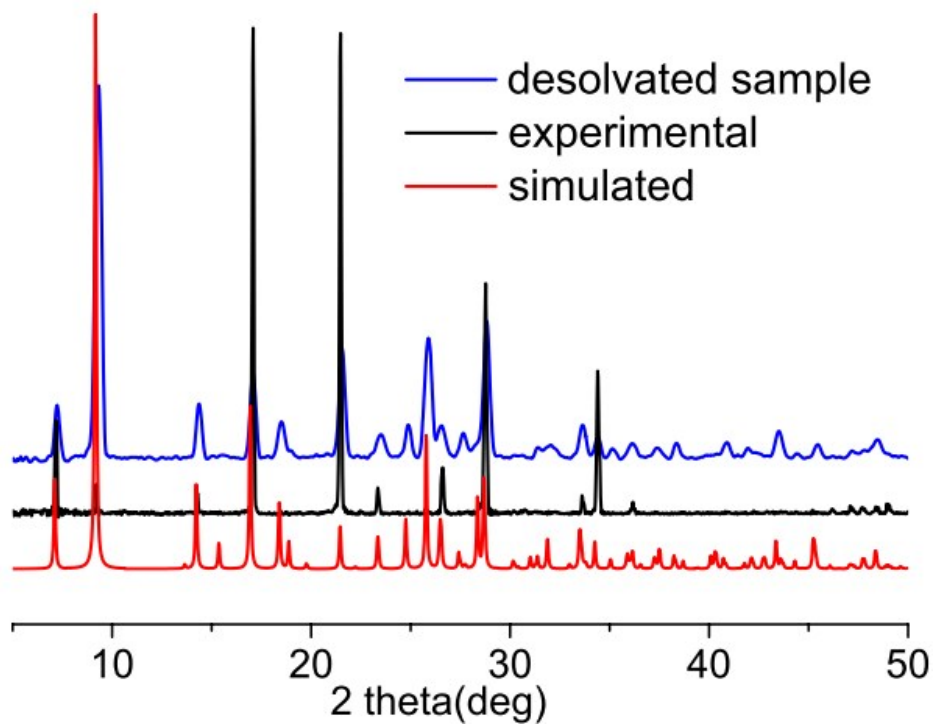

Fig. S2. PXRD patterns for 2 (simulated: red; experimental: black; desolvated sample: blue).

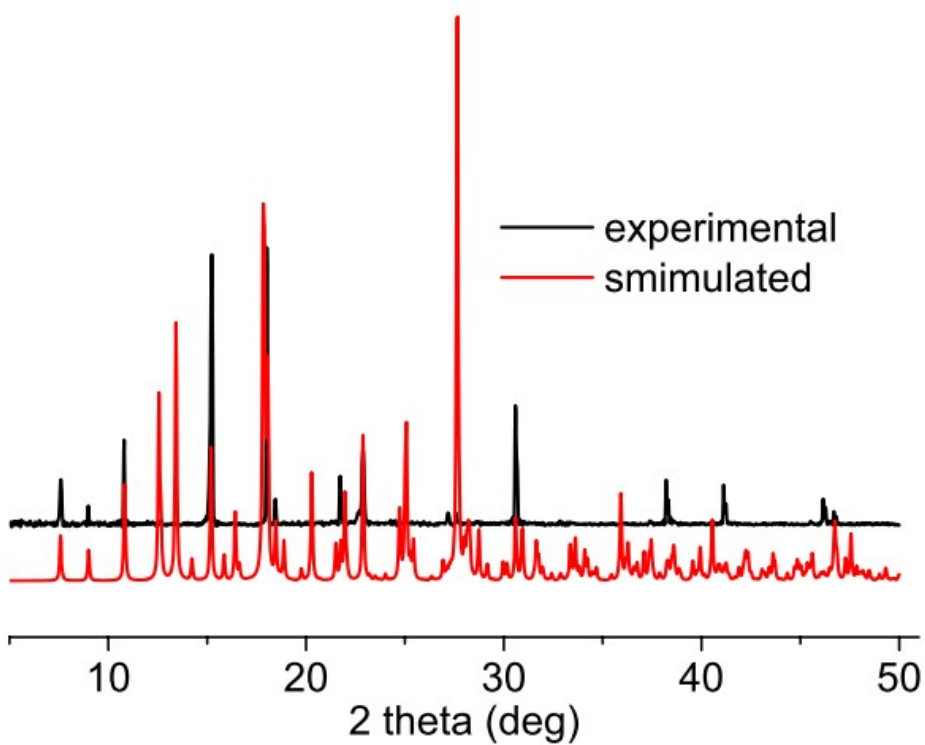

Fig. S3. PXRD patterns for 4 (simulated: red; experimental: black).

Table 2 Selected bond lengths [Å] and angles [°] for **1 - 4**.

| Compound <b>1</b>                                                              |            |             |            |
|--------------------------------------------------------------------------------|------------|-------------|------------|
| Zn1-O1A                                                                        | 2.000(2)   | Zn1-N4B     | 2.001(2)   |
| Zn1-O4                                                                         | 2.022(2)   | Zn1-N1C     | 2.003(2)   |
| O1A-Zn1-N4B                                                                    | 101.55(9)  | O1A-Zn1-O4  | 93.78(8)   |
| N4B-Zn1-O4                                                                     | 115.65(9)  | O1A-Zn1-N1C | 111.71(9)  |
| N4B-Zn1-N1C                                                                    | 125.22(10) | O4-Zn1-N1C  | 104.47(10) |
| A x+1, y, z; B -x+1, y-1/2, -z+1/2; C -x+1, -y+1, -z+1                         |            |             |            |
| Compound <b>2</b>                                                              |            |             |            |
| Cd1-O1                                                                         | 2.181(11)  | Cd1-O4A     | 2.191(13)  |
| Cd1-O5                                                                         | 2.236(12)  | Cd1-N1B     | 2.507(14)  |
| Cd1-N1C                                                                        | 2.507(14)  | Cd1-O3A     | 2.535(15)  |
| Cd2-O5D                                                                        | 2.228(7)   | Cd2-N2B     | 2.319(10)  |
| Cd2-O6                                                                         | 2.336(11)  |             |            |
| O1-Cd1-O4A                                                                     | 100.4(5)   | O1-Cd1-O5   | 114.3(5)   |
| O4A-Cd1-O5                                                                     | 145.2(5)   | O1-Cd1-N1B  | 92.5(2)    |
| O4A-Cd1-N1B                                                                    | 92.5(2)    | O5-Cd1-N1B  | 86.3(2)    |
| O1-Cd1-N1C                                                                     | 92.5(2)    | O4A-Cd1-N1C | 92.47(9)   |
| O5-Cd1-N1C                                                                     | 86.34(7)   | N1B-Cd1-N1C | 172.2(4)   |
| O1-Cd1-O3A                                                                     | 155.0(5)   | O4A-Cd1-O3A | 54.6(5)    |
| O5-Cd1-O3A                                                                     | 90.7(5)    | N1B-Cd1-O3A | 89.0(2)    |
| N1C-Cd1-O3A                                                                    | 89.0(2)    | O5B-Cd2-O5D | 180        |
| O5D-Cd2-N2B                                                                    | 95.0(4)    | O5-Cd2-N2B  | 85.0(4))   |
| O5-Cd2-N2E                                                                     | 95.0(4)    | N2E-Cd2-N2B | 180        |
| O5D-Cd2-O6                                                                     | 90.7(5)    | O5-Cd2-O6   | 89.3(5)    |
| N2E-Cd2-O6                                                                     | 86.0(4)    | N2B-Cd2-O6  | 94.0(4)    |
| O6-Cd2-O6D                                                                     | 180        |             |            |
| A x+1, y, z; B --x+1,-y,-z+1; C -x+1,y+1/2,-z+1 ; D -x+2,-y,-z+2; E x+1,y,z+1. |            |             |            |

| Compound 3  |           |             |           |
|-------------|-----------|-------------|-----------|
| Mn1-O3A     | 2.049(5)  | Mn1-O6      | 2.161(5)  |
| Mn1-N2      | 2.179(6)  | Mn1-O1B     | 2.206(5)  |
| Mn1-O2B     | 2.340(5)  | Mn1-O5      | 2.357(5)  |
| Na1-O4C     | 2.374(7)  | Na1-O1B     | 2.397(6)  |
| Na1-O5D     | 2.444(6)  | Na1-N1      | 2.452(7)  |
| Na1-O2E     | 2.595(6)  |             |           |
| O3A-Mn1-O6  | 92.0(2)   | O3A-Mn1-N2  | 102.3(2)  |
| O6-Mn1-N2   | 99.5(2)   | O3A-Mn1-O1B | 164.6(2)  |
| O6-Mn1-O1B  | 92.9(2)   | N2-Mn1-O1B  | 91.3(2)   |
| O3A-Mn1-O2B | 107.5(2)  | O6-Mn1-O2B  | 89.80(19) |
| N2-Mn1-O2B  | 148.4(2)  | O1B-Mn1-O2B | 57.91(17) |
| O3A-Mn1-O5  | 85.7(2)   | O6-Mn1-O5   | 167.2(2)  |
| N2-Mn1-O5   | 93.3(2)   | O1B-Mn1-O5  | 86.30(19) |
| O2B-Mn1-O5  | 78.99(18) | O4C-Na1-O1B | 81.3(2)   |
| O4C-Na1-O5D | 107.4(2)  | O1B-Na1-O5D | 115.3(2)  |
| O4C-Na1-N1  | 127.8(2)  | O1B-Na1-N1  | 82.0(2)   |
| O5D-Na1-N1  | 124.4(2)  | O4C-Na1-O2E | 86.3(2)   |
| O1B-Na1-O2E | 166.9(2)  | O5D-Na1-O2E | 72.64(18) |
| N1-Na1-O2E  | 102.3(2)  |             |           |

Hydrogen bond lengths (Å) and angles (°) for Compound 3<sup>a</sup>.

| D  | A[Transformation]         | d(D-H) | d(H···A) | d(D···A)  | <(DHA) |
|----|---------------------------|--------|----------|-----------|--------|
| O5 | O4[-x+1/2, y-1/2, -z+1/2] | 0.85   | 1.94     | 2.785(8)  | 171    |
| O5 | N4[-x+1, -y+1, -z+1]      | 0.85   | 2.04     | 2.860(6)  | 161    |
| O6 | O2[-x+1, y-1, -z+1/2]     | 0.85   | 2.02     | 2.815(7)  | 155    |
| O6 | N3[-x+1, y, -z+1/2]       | 0.85   | 1.98     | 2.771(10) | 156    |

<sup>a</sup> D, donor; A, acceptor. A x, y-1, z; B x-1/2, -y+3/2, z-1/2; C -x+1/2, y-1/2, -z+1/2; D-x+1/2, y+1/2, -z+1/2; E -x+1, -y+2, -z+1.

Compound 4

|             |            |              |           |
|-------------|------------|--------------|-----------|
| Mn1-O4A     | 2.092(5)   | Mn1-O2       | 2.154(4)  |
| Mn1-O9      | 2.197(6)   | Mn1-O6       | 2.201(6)  |
| Mn1-O7      | 2.214(5)   | Mn1-O5       | 2.217(6)  |
| Mn2-O10     | 2.155(7)   | Mn2-O8       | 2.223(5)  |
| Mn2-N1      | 2.264(5)   |              |           |
| O4A-Mn1-O2  | 174.68(19) | O4A-Mn1-O9   | 89.8(2)   |
| O2-Mn1-O9   | 84.8(2)    | O4A-Mn1-O6   | 87.4(2)   |
| O2-Mn1-O6   | 92.7(2)    | O6-Mn1-O9    | 89.7(3)   |
| O4A-Mn1-O7  | 98.7(2)    | O2-Mn1-O7    | 86.62(19) |
| O6-Mn1-O7   | 89.0(2)    | O9-Mn1-O7    | 171.3(2)  |
| O4A-Mn1-O5  | 91.1(2)    | O2-Mn1-O5    | 88.7(2)   |
| O9-Mn1-O5   | 90.1(3)    | O6-Mn1-O5    | 178.5(2)  |
| O7-Mn1-O5   | 91.3(2)    | O10-Mn2-O10B | 180       |
| O10-Mn2-O8B | 91.3(2)    | O10-Mn2-O8   | 88.8(3)   |
| O10B-Mn2-O8 | 91.2(3)    | O8B-Mn2-O8   | 180       |
| O10-Mn2-N1B | 88.8(3)    | O10-Mn2-N1   | 91.2(3)   |
| O8-Mn2-N1   | 94.38(19)  | O8-Mn2-N1B   | 85.62(19) |
| N1B-Mn2-N1  | 180        |              |           |

Hydrogen bond lengths (Å) and angles (°) for Compound 4<sup>a</sup>.

| D  | A[Transformation]    | d(D-H) | d(H···A) | d(D···A)  | <(DHA) |
|----|----------------------|--------|----------|-----------|--------|
| O5 | O11                  | 0.86   | 2.02     | 2.855(11) | 165    |
| O5 | N2[-x+1,-y+1,-z+1]   | 0.86   | 1.94     | 2.790(7)  | 169    |
| O6 | O11[ x-1, y, z ]     | 0.85   | 1.93     | 2.785(11) | 176    |
| O6 | N3[-x+1, -y, -z+1]   | 0.85   | 1.89     | 2.734(7)  | 173    |
| O7 | O1                   | 0.85   | 1.92     | 2.728(7)  | 158    |
| O7 | O8[-x+1, -y+1, -z+1] | 0.85   | 2.16     | 2.905(8)  | 147    |
| O8 | O3[-x+2, -y, -z+1]   | 0.85   | 1.81     | 2.655(7)  | 173    |
| O8 | O1[x, y, z+1]        | 0.85   | 2.01     | 2.807(7)  | 158    |
| O9 | O6[-x, -y+1, -z+1]   | 0.85   | 2.14     | 2.859(8)  | 142    |

O10 O12' 0.71 2.25 2.96(2) 175

<sup>a</sup>D, donor; A, acceptor. A  $x-1, y+1, z$ ; B  $-x+1, -y, -z+2$ ; C  $x+1, y-1, z$ .

---

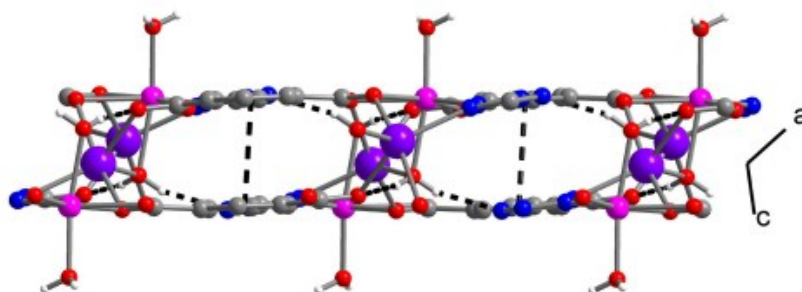

**Fig. S4** Side views of the 2D layer in **3**.

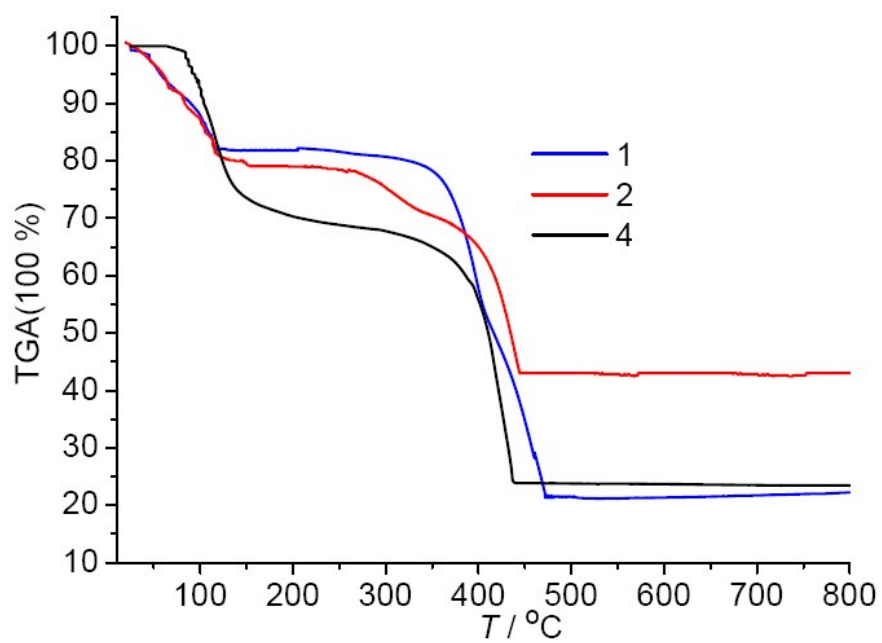

**Fig. S5** The TGA curves for **1**, **2** and **4**.
